# Supplementary material
Source: PubMed Central journal article supplement (PMC7752816)
Supplement: NIHMS1646838-supplement-Supplemental_Publication_Material.pdf [file NIHMS1646838-supplement-Supplemental_Publication_Material.pdf]

# **Supplemental Material**

**Supplemental Table I. Sarcomere function and cytoplasmic calcium in freshly-isolated myocytes from WT and SKI mice.**

| <b>Sarcomere</b>                                                      | <b>WT</b>         | <b>SKI</b>        | <b>p-value</b> |
|-----------------------------------------------------------------------|-------------------|-------------------|----------------|
| Baseline (um)                                                         | 1.86 $\pm$ 0.01   | 1.82 $\pm$ 0.01   | 0.07           |
| Dep V (um/sec)                                                        | -2.77 $\pm$ 0.33  | -1.57 $\pm$ 0.18  | 0.002*         |
| Peak T (msec)                                                         | 0.038 $\pm$ 0.001 | 0.047 $\pm$ 0.002 | 0.009*         |
| <b>Calcium</b>                                                        | <b>WT</b>         | <b>SKI</b>        | <b>p-value</b> |
| Diastolic                                                             | 1.64 $\pm$ 0.05   | 1.58 $\pm$ 0.04   | 0.32           |
| Dep V (um/sec)                                                        | 76.97 $\pm$ 5.7   | 59.8 $\pm$ 5.03   | 0.02*          |
| Systolic                                                              | 2.19 $\pm$ 0.06   | 2.04 $\pm$ 0.06   | 0.08           |
| Peak T (msec)                                                         | 0.017 $\pm$ 0.00  | 0.019 $\pm$ 0.001 | 0.13           |
| Values are mean $\pm$ SEM. (n=7-12; *P<0.05 vs. WT; unpaired t-test). |                   |                   |                |

# Supplemental Figure I.

**A.**

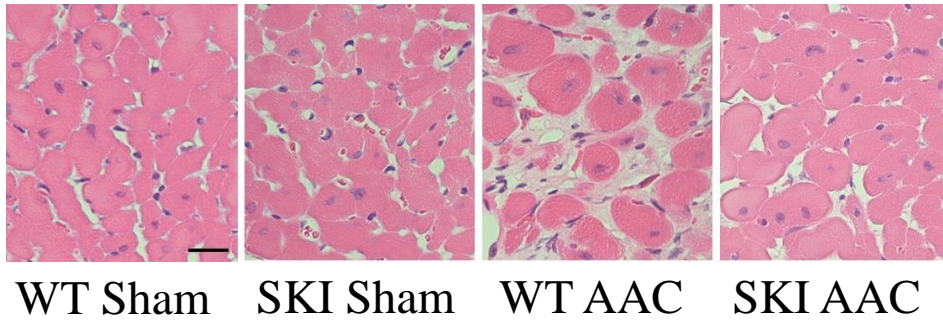

**B.**

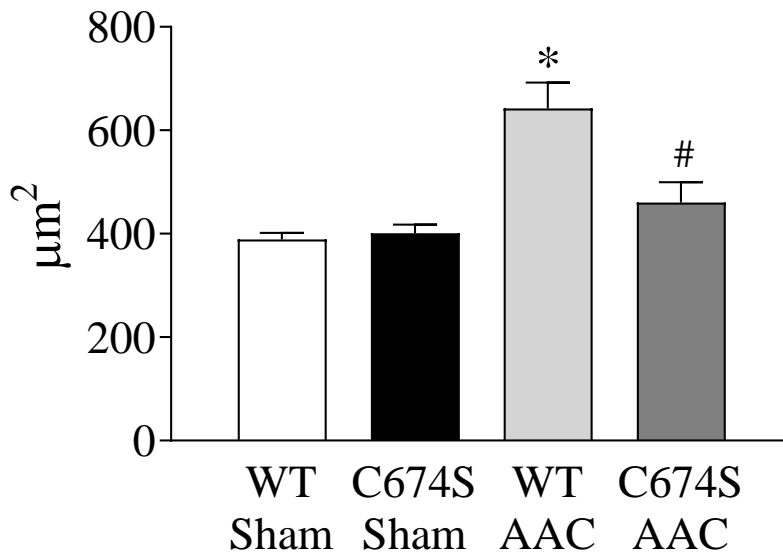

**Supplemental Figure I. Cardiac myocyte cross-sectional area. Panel A.** Representative photomicrograph of myocardium stained with hematoxylin and eosin (bar = 25  $\mu\text{m}$ ). **Panel B.** Mean myocyte cross-sectional area measured 12 weeks after AAC (n = 5-7; \* =  $P < 0.001$  vs. WT sham; # =  $P < 0.01$  vs. WT AAC; ANOVA with Bonferroni correction).

## Supplemental Figure II.

**A.**

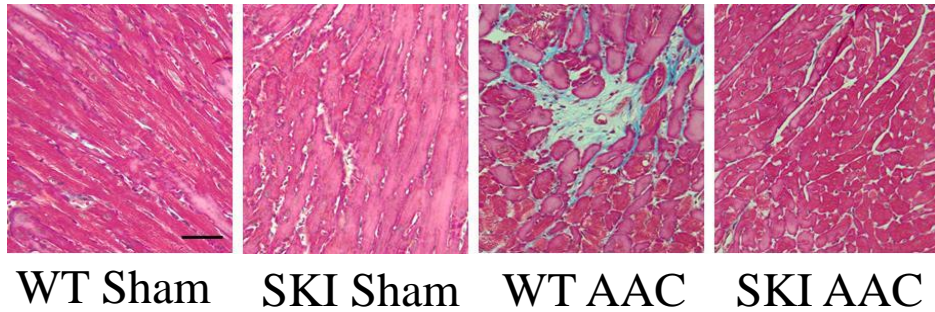

**B.**

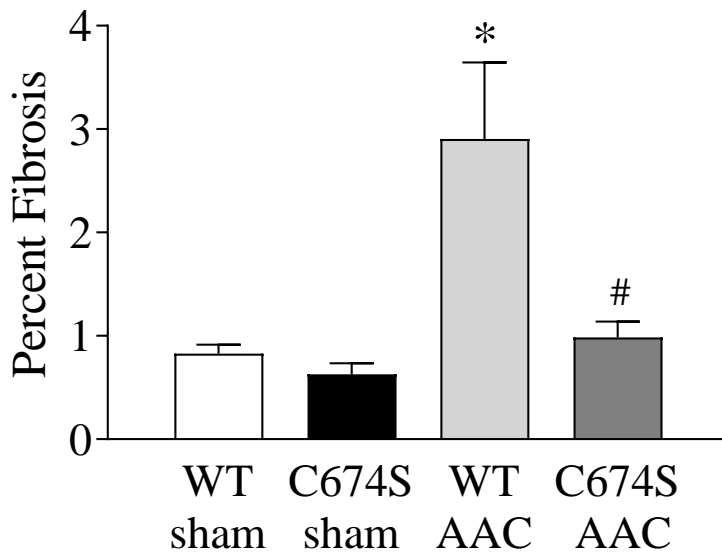

**Supplemental Figure II. Interstitial fibrosis. Panel A.** Representative photomicrograph of myocardium stained with Masson's trichrome to assess fibrosis (collagen stains blue; bar = 50  $\mu$ m). **Panel B.** Mean percentage of interstitial fibrosis as assessed with Masson's trichrome staining measured 12 weeks after AAC (n = 5-7; \* =  $P < 0.05$  vs. WT Sham; # =  $P < 0.05$  vs. WT AAC; ANOVA with Bonferroni correction).

## Supplemental Figure III.

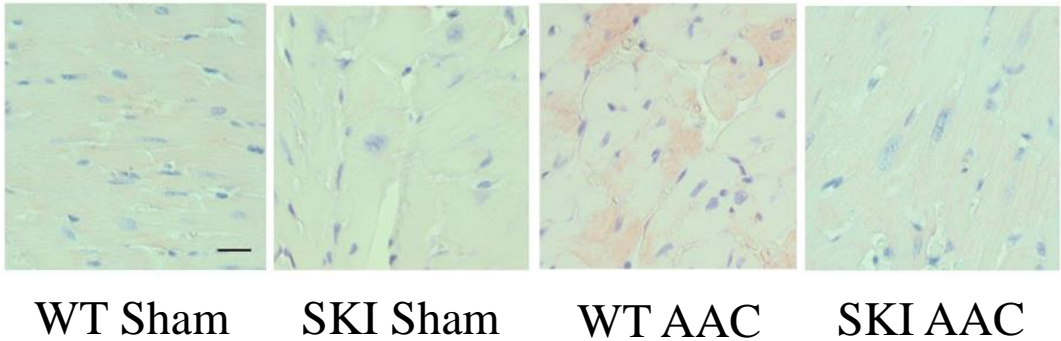

**Supplemental Figure III. Immunohistochemical staining to identify active caspase 3.** Cleaved caspase 3 stains red. Bar = 25  $\mu$ m. Score data are depicted in Figure 7A.

## Supplemental Figure IV.

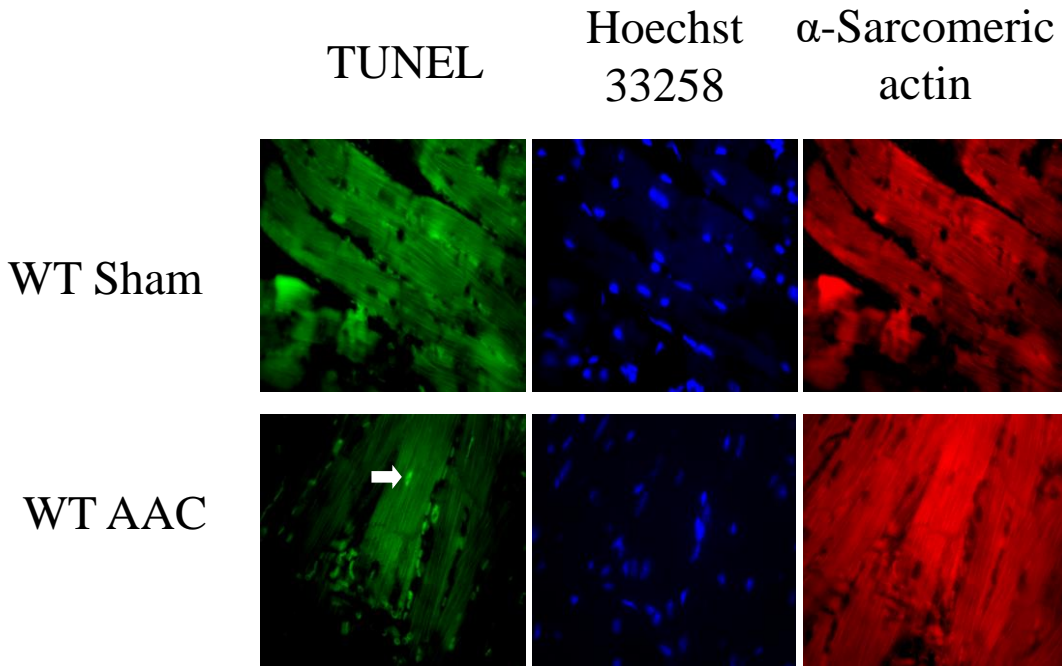

**Supplemental Figure IV. TUNEL staining to identify cardiac myocyte apoptosis 12 weeks after AAC.** Representative photomicrographs (40X magnification) of left ventricular myocardium illustrating technique for identification of terminal deoxynucleotidyl transferase dUTP nick end-labeling (TUNEL) of apoptotic myocytes. An apoptotic nucleus (arrow) is identified by green fluorescence; nuclei stained by Hoechst 33258 are shown in blue; cardiomyocytes identified by  $\alpha$ -sarcomeric actin staining are shown in red. Mean data are depicted in Figure 7B.
